# Supplementary material for: Assessing training needs in infectious disease management at major ports, airports and ground-crossings in Europe
Source: Springer Nature journal article supplement (doi:10.1186/s12889-021-11008-z), 2021-05-29
Supplement: MOESM2 [file 19209438]

# Training needs assessment for designated airports (PDF of online survey)

## Training Needs Assessment: Core capacities at designated airports

Page 1

### Introduction:

Dear Sir/Madam,

We hereby present a questionnaire aimed at people responsible or (partly) involved in preparedness and response regarding cross-border health threats, at designated airports in Europe.

### Background

This training needs assessment is part of the Healty Gateways Joint Action 2018, which aims to improve preparedness and response regarding cross border health threats, and enhanced implementation of the IHR core capacities for designated points of entry in Europe. Part of this Joint Action is the development of a training program.

### Goal

The goal of this questionnaire is to assess the training needs of people involved in hygiene and infectious disease prevention and control at designated airports. With the results of this assessment, we aim to set up relevant and effective training sessions.

### Who are we looking for?

We are looking for people at the operational and management level at designated airports, who are involved in a.o.:

- inspection of aircrafts;
- disinfection/decontamination of cargo;
- quarantine or assessment of ill travellers;
- preparedness planning, training;
- and/or crisis management work.

It might be possible that these tasks belong to several professions at your airport. Please do not hesitate to consult any colleagues during completion of the questionnaire for your designated airport.

If you have any questions, please send an e-mail to [lcionderzoek@rivm.nl](mailto:lcionderzoek@rivm.nl)

Completing the questionnaire will take about **20 minutes**. Please complete the questionnaire before **9 November 2018**.

Thank you.

This online questionnaire was funded by the European Union's Health Programme (2014-2020).

The content of this online questionnaire represents the views of the author only and is his/her sole responsibility; it cannot be considered to reflect the views of the European Commission and/or the Consumers, Health, Agriculture and Food Executive Agency (CHAFEA) or any other body of the European Union. The European Commission and the Agency do not accept any responsibility for use that may be made of the information it contains.

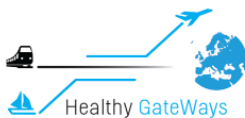

Page 2

### Privacy and personal data protection statement

This questionnaire is developed as part of the Joint Action Healthy Gateways. The data will be analyzed by the National Institute for Public Health and the Environment (RIVM) in the Netherlands (Bilthoven) (contact e-mail: [LClonderzoek@rivm.nl](mailto:LClonderzoek@rivm.nl)). The questions regarding chemical threats will be analyzed by Public Health England. In accordance with the EU General Data Protection Regulation we ask your consent for the use of your data:

- The purpose of the information collected in this form is to assess training needs and to organize trainings on core capacity requirements for points of entry.
- The data can be used for (scientific) publications. It will not be further utilized for any incompatible purpose(s) and will not be passed to any third parties.
- Your contact details will only be used for communication with you, e.g. for updates and additional questions on the subject. Your contact details will be removed and erased as soon as this communication is not opportune anymore or on your first request. Your data will not be used for automated decision making. The data will be stored for 10 years.

Consent is required to process your data.

By ticking the box below, I agree and give my consent to the processing of my personal information including on this form, according to the above statement. \*

Please be informed that you have the right to access, correct, delete, restrict your data processing, and submit a complaint to the Data Protection Authority in accordance with Articles 15-22 of the General Data Protection Regulation (GDPR). Deleting, correcting or restriction of your data will not affect the processing of the data before its withdrawal. In order to exercise your rights you can contact us by email at the email address: LClonderzoek@rivm.nl.

**Personal details - Please provide the following information:**

 Gender: \*

Country: \*

Name of the designated airport: \*

The sector you work in: \*

The level you work at: \*

Highest completed education: \*

Job title: \*

Years of experience in your current job: \*

Do you have management tasks regarding the designated airport?

If yes, how much of your working time do you spend on these tasks? \*

Do you have operational tasks regarding the designated airport?

If yes, how much of your working time do you spend on these tasks? \*

If yes, how much of your working time do you spend on these tasks? \*

Do you have operational tasks regarding the designated airport?

If yes, how much of your working time do you spend on these tasks? \*

**Instruction:**

The questionnaire is divided into three parts. For each part, you will be asked to do the following:

- Please rate how important you think a topic is regarding your designated airport.
- Please rate your training need for each topic.
- Please select your preference for a type of training.

**Overview:**

The questionnaire is divided into three parts.

First, services that could be available at all times are being assessed. Topics are:

- health risks at designated airports
- a safe environment for travellers
- routine inspection of aircrafts
- ill travellers

Second, capacities that should be available in case response (a PHEIC)\* is needed. Topics are:

- the public health emergency plan
- recommended measures
- affected persons
- affected animals

Third, a section follows about chemical hazards at airports

\* during events that may constitute a public health emergency of international concern (PHEIC): an event that constitutes a public health risk to other countries through the international spread of disease and which may require a coordinated international response.

24

Single click = Select item  
Right click = Menu  
Double click = Edit item

The following questions regard core capacities for designated airports, which should be available **at all times**. Please rate how important these topics are in your current job at the designated airport. And please rate the training need you feel on these topics.

**A. Health risks at the designated port**

|                                                                | Importance of the topic |                       |                       |                       |                       | Training Needs        |                       |                       |                       |                       |
|----------------------------------------------------------------|-------------------------|-----------------------|-----------------------|-----------------------|-----------------------|-----------------------|-----------------------|-----------------------|-----------------------|-----------------------|
|                                                                | High                    | Moderate              | Low                   | No                    | I don't know          | Intensive             | Moderate              | Low                   | No                    | I don't know          |
| 1. Knowledge of public health risks from biological agents *   | <input type="radio"/>   | <input type="radio"/> | <input type="radio"/> | <input type="radio"/> | <input type="radio"/> | <input type="radio"/> | <input type="radio"/> | <input type="radio"/> | <input type="radio"/> | <input type="radio"/> |
| 2. Knowledge of public health risks from chemical agents *     | <input type="radio"/>   | <input type="radio"/> | <input type="radio"/> | <input type="radio"/> | <input type="radio"/> | <input type="radio"/> | <input type="radio"/> | <input type="radio"/> | <input type="radio"/> | <input type="radio"/> |
| 3. Knowledge of public health risks from radiological agents * | <input type="radio"/>   | <input type="radio"/> | <input type="radio"/> | <input type="radio"/> | <input type="radio"/> | <input type="radio"/> | <input type="radio"/> | <input type="radio"/> | <input type="radio"/> | <input type="radio"/> |
| 4. Other, please specify below                                 | <input type="radio"/>   | <input type="radio"/> | <input type="radio"/> | <input type="radio"/> | <input type="radio"/> | <input type="radio"/> | <input type="radio"/> | <input type="radio"/> | <input type="radio"/> | <input type="radio"/> |

Please specify any specific training need on these topics.

Did you receive training on this topic in the last 3 years? \*  Yes  No  I don't know

What type of training has your preference regarding this topic? \*

- Case-studies
- E-module
- Presentations
- Simulation
- Discussion / knowledge exchange
- I do not have preference
- Other, please specify:

90

Single click = Select item

Right click = Menu

Double click = Edit item

The following questions regard core capacities for designated airports, which should be available **at all times**. Please rate how important these topics are in your current job at the designated airport. And please rate the training need you feel on these topics.

**B. A safe environment for travellers using airport facilities**

|                                                        | Importance of the topic |                       |                       |                       |                       | Training Needs        |                       |                       |                       |                       |
|--------------------------------------------------------|-------------------------|-----------------------|-----------------------|-----------------------|-----------------------|-----------------------|-----------------------|-----------------------|-----------------------|-----------------------|
|                                                        | High                    | Moderate              | Low                   | No                    | I don't know          | Intensive             | Moderate              | Low                   | No                    | I don't know          |
| 1. Inspection programs *                               | <input type="radio"/>   | <input type="radio"/> | <input type="radio"/> | <input type="radio"/> | <input type="radio"/> | <input type="radio"/> | <input type="radio"/> | <input type="radio"/> | <input type="radio"/> | <input type="radio"/> |
| 2. Vector control at/near the designated airport *     | <input type="radio"/>   | <input type="radio"/> | <input type="radio"/> | <input type="radio"/> | <input type="radio"/> | <input type="radio"/> | <input type="radio"/> | <input type="radio"/> | <input type="radio"/> | <input type="radio"/> |
| 3. Food- and water safety *                            | <input type="radio"/>   | <input type="radio"/> | <input type="radio"/> | <input type="radio"/> | <input type="radio"/> | <input type="radio"/> | <input type="radio"/> | <input type="radio"/> | <input type="radio"/> | <input type="radio"/> |
| 4. Public washrooms; solid & liquid waste management * | <input type="radio"/>   | <input type="radio"/> | <input type="radio"/> | <input type="radio"/> | <input type="radio"/> | <input type="radio"/> | <input type="radio"/> | <input type="radio"/> | <input type="radio"/> | <input type="radio"/> |
| 5. Air quality *                                       | <input type="radio"/>   | <input type="radio"/> | <input type="radio"/> | <input type="radio"/> | <input type="radio"/> | <input type="radio"/> | <input type="radio"/> | <input type="radio"/> | <input type="radio"/> | <input type="radio"/> |
| 6. Other, please specify below                         | <input type="radio"/>   | <input type="radio"/> | <input type="radio"/> | <input type="radio"/> | <input type="radio"/> | <input type="radio"/> | <input type="radio"/> | <input type="radio"/> | <input type="radio"/> | <input type="radio"/> |

Please specify any specific training need on these topics.

Did you receive training on this topic in the last 3 years? \*  Yes  No  I don't know

What type of training has your preference regarding this topic? \*

- Case-studies
- E-module
- Presentations
- Simulation
- Discussion / knowledge exchange
- I do not have preference
- Other, please specify:

90

Single click = Select item

The following questions regard core capacities for designated airports, which should be available **at all times**. Please rate how important these topics are in your current job at the designated airport. And please rate the training need you feel on these topics.

### C. Routine inspection of ships

|                                              | Importance of the topic |                       |                       |                       |                       | Training Needs        |                       |                       |                       |                       |
|----------------------------------------------|-------------------------|-----------------------|-----------------------|-----------------------|-----------------------|-----------------------|-----------------------|-----------------------|-----------------------|-----------------------|
|                                              | High                    | Moderate              | Low                   | No                    | I don't know          | Intensive             | Moderate              | Low                   | No                    | I don't know          |
| 1. Following standard operating procedures * | <input type="radio"/>   | <input type="radio"/> | <input type="radio"/> | <input type="radio"/> | <input type="radio"/> | <input type="radio"/> | <input type="radio"/> | <input type="radio"/> | <input type="radio"/> | <input type="radio"/> |
| 2. Sewage; solid- and medical wastes *       | <input type="radio"/>   | <input type="radio"/> | <input type="radio"/> | <input type="radio"/> | <input type="radio"/> | <input type="radio"/> | <input type="radio"/> | <input type="radio"/> | <input type="radio"/> | <input type="radio"/> |
| 3. Food- and water safety *                  | <input type="radio"/>   | <input type="radio"/> | <input type="radio"/> | <input type="radio"/> | <input type="radio"/> | <input type="radio"/> | <input type="radio"/> | <input type="radio"/> | <input type="radio"/> | <input type="radio"/> |
| 4. Assessment of required health documents * | <input type="radio"/>   | <input type="radio"/> | <input type="radio"/> | <input type="radio"/> | <input type="radio"/> | <input type="radio"/> | <input type="radio"/> | <input type="radio"/> | <input type="radio"/> | <input type="radio"/> |
| 5. Other, please specify below               | <input type="radio"/>   | <input type="radio"/> | <input type="radio"/> | <input type="radio"/> | <input type="radio"/> | <input type="radio"/> | <input type="radio"/> | <input type="radio"/> | <input type="radio"/> | <input type="radio"/> |

Please specify any specific training need on these topics.

Did you receive training on this topic in the last 3 years? \*

Yes  No  I don't know

What type of training has your preference regarding this topic? \*

- Case-studies  
 E-module  
 Presentations  
 Simulation  
 Discussion / knowledge exchange  
 I do not have preference  
 Other, please specify:

The following questions regard core capacities for designated airports, which should be available **at all times**. Please rate how important these topics are in your current job at the designated airport. And please rate the training need you feel on these topics.

### D. Prompt assessment of ill travelers

|                                                                                                         | Importance of the topic |                       |                       |                       |                       | Training Needs        |                       |                       |                       |                       |
|---------------------------------------------------------------------------------------------------------|-------------------------|-----------------------|-----------------------|-----------------------|-----------------------|-----------------------|-----------------------|-----------------------|-----------------------|-----------------------|
|                                                                                                         | High                    | Moderate              | Low                   | No                    | I don't know          | Intensive             | Moderate              | Low                   | No                    | I don't know          |
| 1. Use of protective equipment (a.o. correct type; donning and doffing) *                               | <input type="radio"/>   | <input type="radio"/> | <input type="radio"/> | <input type="radio"/> | <input type="radio"/> | <input type="radio"/> | <input type="radio"/> | <input type="radio"/> | <input type="radio"/> | <input type="radio"/> |
| 2. Safe removal of travellers for assessment, care, quarantine or isolation *                           | <input type="radio"/>   | <input type="radio"/> | <input type="radio"/> | <input type="radio"/> | <input type="radio"/> | <input type="radio"/> | <input type="radio"/> | <input type="radio"/> | <input type="radio"/> | <input type="radio"/> |
| 3. Triage (a.o. standard procedures, recognition of disease symptoms of possible contagious diseases) * | <input type="radio"/>   | <input type="radio"/> | <input type="radio"/> | <input type="radio"/> | <input type="radio"/> | <input type="radio"/> | <input type="radio"/> | <input type="radio"/> | <input type="radio"/> | <input type="radio"/> |
| 4. Identifying and calling in appropriate diagnostic facilities and medical services *                  | <input type="radio"/>   | <input type="radio"/> | <input type="radio"/> | <input type="radio"/> | <input type="radio"/> | <input type="radio"/> | <input type="radio"/> | <input type="radio"/> | <input type="radio"/> | <input type="radio"/> |
| 5. Other, please specify below                                                                          | <input type="radio"/>   | <input type="radio"/> | <input type="radio"/> | <input type="radio"/> | <input type="radio"/> | <input type="radio"/> | <input type="radio"/> | <input type="radio"/> | <input type="radio"/> | <input type="radio"/> |

Please specify any specific training need on these topics.

Did you receive training on this topic in the last 3 years? \*

Yes  No  I don't know

What type of training has your preference regarding this topic? \*

- Case-studies  
 E-module  
 Presentations  
 Simulation  
 Discussion / knowledge exchange  
 I do not have preference  
 Other, please specify:

#### Instruction:

For the following questions those **during response (a PHEIC)\*** will be assessed. You will again be asked to do the following:

- to assess the importance of these topics in your current job regarding the designated airport.
- to rate your training needs per topic.

Thank you.

\* a public health emergencies of international concern: an event that constitutes a public health risk to other countries through the international spread of disease and which may require an coordinated international response.

The following questions regard core capacities for designated airports, which should be available during **response to events that may constitute a public health event of international concern**. Please rate how important these topics are in your current job at the designated airport. And please rate the training need you feel on these topics.

**E. The public health emergency contingency plan**

|                                                                                                                                | Importance of the topic |                       |                       |                       |                       | Training Needs        |                       |                       |                       |                       |
|--------------------------------------------------------------------------------------------------------------------------------|-------------------------|-----------------------|-----------------------|-----------------------|-----------------------|-----------------------|-----------------------|-----------------------|-----------------------|-----------------------|
|                                                                                                                                | High                    | Moderate              | Low                   | No                    | I don't know          | Intensive             | Moderate              | Low                   | No                    | I don't know          |
| 1. Composing and updating a public health emergency contingency plan *                                                         | <input type="radio"/>   | <input type="radio"/> | <input type="radio"/> | <input type="radio"/> | <input type="radio"/> | <input type="radio"/> | <input type="radio"/> | <input type="radio"/> | <input type="radio"/> | <input type="radio"/> |
| 2. Adequate and timely usage of the public health emergency contingency plan *                                                 | <input type="radio"/>   | <input type="radio"/> | <input type="radio"/> | <input type="radio"/> | <input type="radio"/> | <input type="radio"/> | <input type="radio"/> | <input type="radio"/> | <input type="radio"/> | <input type="radio"/> |
| 3. Arrangements between the designated airport and local medical services (for a.o. isolation or treatment of ill travelers) * | <input type="radio"/>   | <input type="radio"/> | <input type="radio"/> | <input type="radio"/> | <input type="radio"/> | <input type="radio"/> | <input type="radio"/> | <input type="radio"/> | <input type="radio"/> | <input type="radio"/> |
| 4. Other, please specify below                                                                                                 | <input type="radio"/>   | <input type="radio"/> | <input type="radio"/> | <input type="radio"/> | <input type="radio"/> | <input type="radio"/> | <input type="radio"/> | <input type="radio"/> | <input type="radio"/> | <input type="radio"/> |

Please specify any specific training need on these topics.

Did you receive training on this topic in the last 3 years? \*  Yes  No  I don't know

What type of training has your preference regarding this topic? \*

- Case-studies
- E-module
- Presentations
- Simulation
- Discussion / knowledge exchange
- I do not have preference
- Other, please specify:

The following questions regard core capacities for designated airports, which should be available during **response to events that may constitute a public health event of international concern**. Please rate how important these topics are in your current job at the designated airport. And please rate the training need you feel on these topics.

**F. Recommended Measures**

|                                                                        | Importance of the topic |                       |                       |                       |                       | Training Needs        |                       |                       |                       |                       |
|------------------------------------------------------------------------|-------------------------|-----------------------|-----------------------|-----------------------|-----------------------|-----------------------|-----------------------|-----------------------|-----------------------|-----------------------|
|                                                                        | High                    | Moderate              | Low                   | No                    | I don't know          | Intensive             | Moderate              | Low                   | No                    | I don't know          |
| 1. Measures (disinsection, deratting, disinfection, decontamination) * | <input type="radio"/>   | <input type="radio"/> | <input type="radio"/> | <input type="radio"/> | <input type="radio"/> | <input type="radio"/> | <input type="radio"/> | <input type="radio"/> | <input type="radio"/> | <input type="radio"/> |
| 2. Treating goods, baggage, cargo or postal parcels *                  | <input type="radio"/>   | <input type="radio"/> | <input type="radio"/> | <input type="radio"/> | <input type="radio"/> | <input type="radio"/> | <input type="radio"/> | <input type="radio"/> | <input type="radio"/> | <input type="radio"/> |
| 3. Treating containers or aircrafts *                                  | <input type="radio"/>   | <input type="radio"/> | <input type="radio"/> | <input type="radio"/> | <input type="radio"/> | <input type="radio"/> | <input type="radio"/> | <input type="radio"/> | <input type="radio"/> | <input type="radio"/> |
| 4. Other, please specify below                                         | <input type="radio"/>   | <input type="radio"/> | <input type="radio"/> | <input type="radio"/> | <input type="radio"/> | <input type="radio"/> | <input type="radio"/> | <input type="radio"/> | <input type="radio"/> | <input type="radio"/> |

Please specify any specific training need on these topics.

Did you receive training on this topic in the last 3 years? \*  Yes  No  I don't know

What type of training has your preference regarding this topic? \*

- Case-studies
- E-module
- Presentations
- Simulation
- Discussion / knowledge exchange
- I do not have preference
- Other, please specify:

The following questions regard core capacities for designated airports, which should be available during **response to events that may constitute a public health event of international concern**.

Please rate how important these topics are in your current job at the designated airport. And please rate the training need you feel on these topics.

### G. Affected persons

|                                                                                                                            | Importance of the topic |                       |                       |                       |                       | Training Needs        |                       |                       |                       |                       |
|----------------------------------------------------------------------------------------------------------------------------|-------------------------|-----------------------|-----------------------|-----------------------|-----------------------|-----------------------|-----------------------|-----------------------|-----------------------|-----------------------|
|                                                                                                                            | High                    | Moderate              | Low                   | No                    | I don't know          | Intensive             | Moderate              | Low                   | No                    | I don't know          |
| 1. Use of protective equipment (a.o. correct type, donning and doffing) *                                                  | <input type="radio"/>   | <input type="radio"/> | <input type="radio"/> | <input type="radio"/> | <input type="radio"/> | <input type="radio"/> | <input type="radio"/> | <input type="radio"/> | <input type="radio"/> | <input type="radio"/> |
| 2. Identification and safe use of an appropriate space for assessment, care, quarantine or isolation of affected persons * | <input type="radio"/>   | <input type="radio"/> | <input type="radio"/> | <input type="radio"/> | <input type="radio"/> | <input type="radio"/> | <input type="radio"/> | <input type="radio"/> | <input type="radio"/> | <input type="radio"/> |
| 3. Interview and triage (a.o. standard procedures, recognition of disease symptoms of possible contagious diseases) *      | <input type="radio"/>   | <input type="radio"/> | <input type="radio"/> | <input type="radio"/> | <input type="radio"/> | <input type="radio"/> | <input type="radio"/> | <input type="radio"/> | <input type="radio"/> | <input type="radio"/> |
| 4. Safe transfer of suspected travellers *                                                                                 | <input type="radio"/>   | <input type="radio"/> | <input type="radio"/> | <input type="radio"/> | <input type="radio"/> | <input type="radio"/> | <input type="radio"/> | <input type="radio"/> | <input type="radio"/> | <input type="radio"/> |
| 5. Other, please specify below                                                                                             | <input type="radio"/>   | <input type="radio"/> | <input type="radio"/> | <input type="radio"/> | <input type="radio"/> | <input type="radio"/> | <input type="radio"/> | <input type="radio"/> | <input type="radio"/> | <input type="radio"/> |

Please specify any specific training need on these topics.

Did you receive training on this topic in the last 3 years? \*

Yes  No  I don't know

What type of training has your preference regarding this topic? \*

- Case-studies  
 E-module  
 Presentations  
 Simulation  
 Discussion / knowledge exchange  
 I do not have preference  
 Other, please specify:

The following questions regard core capacities for designated airports, which should be available during **response to events that may constitute a public health event of international concern**.

Please rate how important these topics are in your current job at the designated airport. And please rate the training need you feel on these topics.

### H. Affected animals

|                                                                     | Importance of the topic |                       |                       |                       |                       | Training Needs        |                       |                       |                       |                       |
|---------------------------------------------------------------------|-------------------------|-----------------------|-----------------------|-----------------------|-----------------------|-----------------------|-----------------------|-----------------------|-----------------------|-----------------------|
|                                                                     | High                    | Moderate              | Low                   | No                    | I don't know          | Intensive             | Moderate              | Low                   | No                    | I don't know          |
| 1. Arrangements between the airport and local veterinary services * | <input type="radio"/>   | <input type="radio"/> | <input type="radio"/> | <input type="radio"/> | <input type="radio"/> | <input type="radio"/> | <input type="radio"/> | <input type="radio"/> | <input type="radio"/> | <input type="radio"/> |
| 2. Infection control *                                              | <input type="radio"/>   | <input type="radio"/> | <input type="radio"/> | <input type="radio"/> | <input type="radio"/> | <input type="radio"/> | <input type="radio"/> | <input type="radio"/> | <input type="radio"/> | <input type="radio"/> |
| 3. Care or treatment *                                              | <input type="radio"/>   | <input type="radio"/> | <input type="radio"/> | <input type="radio"/> | <input type="radio"/> | <input type="radio"/> | <input type="radio"/> | <input type="radio"/> | <input type="radio"/> | <input type="radio"/> |
| 4. Other, please specify below                                      | <input type="radio"/>   | <input type="radio"/> | <input type="radio"/> | <input type="radio"/> | <input type="radio"/> | <input type="radio"/> | <input type="radio"/> | <input type="radio"/> | <input type="radio"/> | <input type="radio"/> |

Please specify any specific training need on these topics.

Did you receive training on this topic in the last 3 years? \*

Yes  No  I don't know

What type of training has your preference regarding this topic? \*

- Case-studies  
 E-module  
 Presentations  
 Simulation  
 Discussion / knowledge exchange  
 I do not have preference  
 Other, please specify:

### Instruction:

For the following questions, **chemical hazards** will be assessed. You will again be asked to do the following:

- to assess the importance of these topics in your current job regarding the designated airport.
- to rate your training needs per topic.
- to select topics which you previously received training on, and the delivered and preferred type of training is asked for

Thank you.

The following questions regard core capacities for designated airports regarding **chemical threats**.

Please rate how important these topics are in your current job at the designated airport. And please rate the training need you feel on these topics.

I. Chemical hazards (page 1/2)

|                                                                                                  | Importance of the topic |                       |                       |                       |                       | Training Needs        |                       |                       |                       |                       |
|--------------------------------------------------------------------------------------------------|-------------------------|-----------------------|-----------------------|-----------------------|-----------------------|-----------------------|-----------------------|-----------------------|-----------------------|-----------------------|
|                                                                                                  | High                    | Moderate              | Low                   | No                    | I don't know          | Intensive             | Moderate              | Low                   | No                    | I don't know          |
| 1. Response plan to a chemical incident                                                          | <input type="radio"/>   | <input type="radio"/> | <input type="radio"/> | <input type="radio"/> | <input type="radio"/> | <input type="radio"/> | <input type="radio"/> | <input type="radio"/> | <input type="radio"/> | <input type="radio"/> |
| 2. Notification of the appropriate individuals/authorities of a chemical incident/exposure       | <input type="radio"/>   | <input type="radio"/> | <input type="radio"/> | <input type="radio"/> | <input type="radio"/> | <input type="radio"/> | <input type="radio"/> | <input type="radio"/> | <input type="radio"/> | <input type="radio"/> |
| 3. Risks posed by chemical hazards                                                               | <input type="radio"/>   | <input type="radio"/> | <input type="radio"/> | <input type="radio"/> | <input type="radio"/> | <input type="radio"/> | <input type="radio"/> | <input type="radio"/> | <input type="radio"/> | <input type="radio"/> |
| 4. Initial response if chemical incident/exposure is suspected                                   | <input type="radio"/>   | <input type="radio"/> | <input type="radio"/> | <input type="radio"/> | <input type="radio"/> | <input type="radio"/> | <input type="radio"/> | <input type="radio"/> | <input type="radio"/> | <input type="radio"/> |
| 5. Most common chemicals which pass through your airport.                                        | <input type="radio"/>   | <input type="radio"/> | <input type="radio"/> | <input type="radio"/> | <input type="radio"/> | <input type="radio"/> | <input type="radio"/> | <input type="radio"/> | <input type="radio"/> | <input type="radio"/> |
| 6. Use of chemical personal protective equipment                                                 | <input type="radio"/>   | <input type="radio"/> | <input type="radio"/> | <input type="radio"/> | <input type="radio"/> | <input type="radio"/> | <input type="radio"/> | <input type="radio"/> | <input type="radio"/> | <input type="radio"/> |
| 7. Apply recommended measures to isolate or decontaminate items (e.g. baggage or equipment)      | <input type="radio"/>   | <input type="radio"/> | <input type="radio"/> | <input type="radio"/> | <input type="radio"/> | <input type="radio"/> | <input type="radio"/> | <input type="radio"/> | <input type="radio"/> | <input type="radio"/> |
| 8. Apply recommended measures to transfer travellers who may be contaminated                     | <input type="radio"/>   | <input type="radio"/> | <input type="radio"/> | <input type="radio"/> | <input type="radio"/> | <input type="radio"/> | <input type="radio"/> | <input type="radio"/> | <input type="radio"/> | <input type="radio"/> |
| 9. Identification of a potential chemical incident (smell, appearance, other signs)              | <input type="radio"/>   | <input type="radio"/> | <input type="radio"/> | <input type="radio"/> | <input type="radio"/> | <input type="radio"/> | <input type="radio"/> | <input type="radio"/> | <input type="radio"/> | <input type="radio"/> |
| 10. Communication with neighbouring country/ies in the event of a cross-border chemical incident | <input type="radio"/>   | <input type="radio"/> | <input type="radio"/> | <input type="radio"/> | <input type="radio"/> | <input type="radio"/> | <input type="radio"/> | <input type="radio"/> | <input type="radio"/> | <input type="radio"/> |
| 11. Training together with other airports or points of entries                                   | <input type="radio"/>   | <input type="radio"/> | <input type="radio"/> | <input type="radio"/> | <input type="radio"/> | <input type="radio"/> | <input type="radio"/> | <input type="radio"/> | <input type="radio"/> | <input type="radio"/> |
| 12. Training together with neighbouring country/ies                                              | <input type="radio"/>   | <input type="radio"/> | <input type="radio"/> | <input type="radio"/> | <input type="radio"/> | <input type="radio"/> | <input type="radio"/> | <input type="radio"/> | <input type="radio"/> | <input type="radio"/> |
| 13. Other, please specify below                                                                  | <input type="radio"/>   | <input type="radio"/> | <input type="radio"/> | <input type="radio"/> | <input type="radio"/> | <input type="radio"/> | <input type="radio"/> | <input type="radio"/> | <input type="radio"/> | <input type="radio"/> |

Please specify any specific training need on these topics.

I. Chemical hazards (page 2/2)

The following questions regard the same topics as the previous page, but cover your **experience and preference in training** on these topics.

| Did you receive training on these topics?                                                        | Yes                   | No                    | I don't know          | Delivered type of training | Preferred type of training |
|--------------------------------------------------------------------------------------------------|-----------------------|-----------------------|-----------------------|----------------------------|----------------------------|
| 1. Response plan to a chemical incident                                                          | <input type="radio"/> | <input type="radio"/> | <input type="radio"/> | <Make a choice> ▼          | <Make a choice> ▼          |
| 2. Notification of the appropriate individuals/authorities of a chemical incident/exposure       | <input type="radio"/> | <input type="radio"/> | <input type="radio"/> | <Make a choice> ▼          | <Make a choice> ▼          |
| 3. Risks posed by chemical hazards                                                               | <input type="radio"/> | <input type="radio"/> | <input type="radio"/> | <Make a choice> ▼          | <Make a choice> ▼          |
| 4. Initial response if chemical incident/exposure is suspected                                   | <input type="radio"/> | <input type="radio"/> | <input type="radio"/> | <Make a choice> ▼          | <Make a choice> ▼          |
| 5. Most common chemicals which pass through your airport.                                        | <input type="radio"/> | <input type="radio"/> | <input type="radio"/> | <Make a choice> ▼          | <Make a choice> ▼          |
| 6. Use of chemical personal protective equipment                                                 | <input type="radio"/> | <input type="radio"/> | <input type="radio"/> | <Make a choice> ▼          | <Make a choice> ▼          |
| 7. Apply recommended measures to isolate or decontaminate items (e.g. baggage or equipment)      | <input type="radio"/> | <input type="radio"/> | <input type="radio"/> | <Make a choice> ▼          | <Make a choice> ▼          |
| 8. Apply recommended measures to transfer travellers who may be contaminated                     | <input type="radio"/> | <input type="radio"/> | <input type="radio"/> | <Make a choice> ▼          | <Make a choice> ▼          |
| 9. Identification of a potential chemical incident (smell, appearance, other signs)              | <input type="radio"/> | <input type="radio"/> | <input type="radio"/> | <Make a choice> ▼          | <Make a choice> ▼          |
| 10. Communication with neighbouring country/ies in the event of a cross-border chemical incident | <input type="radio"/> | <input type="radio"/> | <input type="radio"/> | <Make a choice> ▼          | <Make a choice> ▼          |
| 11. Training together with other airports or points of entries                                   | <input type="radio"/> | <input type="radio"/> | <input type="radio"/> | <Make a choice> ▼          | <Make a choice> ▼          |
| 12. Training together with neighbouring country/ies                                              | <input type="radio"/> | <input type="radio"/> | <input type="radio"/> | <Make a choice> ▼          | <Make a choice> ▼          |

Please specify any 'other' types of training on these topics.

You are almost at the end

380: optional\_my\_email\_address

Single click = Select item

Right click = Menu

Double click = Edit item

**Optional:**

I would like to be invited for further interviews on the assessed training needs, and can be reached for this purpose via the following mail address:

You are almost at the end of this questionnaire.

**Optional:**

I would like to be invited for further interviews on the assessed training needs, and can be reached for this purpose via the following mail address:

Did you consult other colleagues for completion of this questionnaire? If yes, please tick the box.

**Consulted colleague 1**

The level this colleague works at: \*

Job title: \*

Years of experience in current job: \*

**Consulted colleague 2**

The level this colleague works at:

Job title:

Years of experience in current job:

**Consulted colleague 3**

The level this colleague works at:

Job title:

Years of experience in current job:

If you have any additional remarks or questions regarding the IHR core capacities for points of entry, this questionnaire or our research, please write them down below.

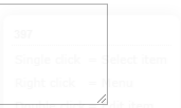

This is the end of this questionnaire.

Thank you very much for completing it, and for helping us gaining more insight in your preferences and needs regarding training content and type.

If you have any remaining questions, remarks, or if you wish to know more about the questionnaire or our research, please send an email to [lcionderzoek@rivm.nl](mailto:lcionderzoek@rivm.nl)

**Please do not forget to click the 'send' button to submit the questionnaire.**
