# Supplementary material for: Assessing training needs in infectious disease management at major ports, airports and ground-crossings in Europe
Source: Springer Nature journal article supplement (doi:10.1186/s12889-021-11008-z), 2021-05-29
Supplement: MOESM6 [file 19209438]

## Additional File 6 –Importance & Training needs per POE type.pdf

Mean scores on training needs and importance for subtopics, presented for ports, airports and ground-crossings separately, including p-values as a result of a one-way anova analysis. The subtopics A1 – H3 correspond with those presented in the main article.

Legend:

| Color | Mean score        |
|-------|-------------------|
|       | <1.0              |
|       | 1≤x<1.5           |
|       | 1.5≤x<2           |
|       | 2≤x<2.5           |
|       | 2.5≤x≤3           |
|       | No data available |

| Training needs (mean) | Ground-crossings |          |                  | One-way ANOVA P-Value | Importance (mean) | Ground-crossings |          |                  | P-value |
|-----------------------|------------------|----------|------------------|-----------------------|-------------------|------------------|----------|------------------|---------|
|                       | Ports            | Airports | Ground-crossings |                       |                   | Ports            | Airports | Ground-crossings |         |
| A1                    | 1.85             | 2.06     | 2                | 0.698                 | A1                | 2.37             | 2.61     | 2.2              | 0.45    |
| A2                    | 1.85             | 1.76     | 1.8              | 0.948                 | A2                | 1.96             | 2.06     | 2                | 0.93    |
| A3                    | 1.62             | 1.63     | 2                | 0.623                 | A3                | 1.65             | 1.82     | 2.2              | 0.392   |
| B1                    | 2.04             | 1.76     | 2                | 0.675                 | B1                | 2.56             | 2.18     | 2.2              | 0.282   |
| B2                    | 2.11             | 1.78     | 2                | 0.544                 | B2                | 2.44             | 2        | 2.2              | 0.306   |
| B3                    | 2.07             | 1.44     | 2                | 0.138                 | B3                | 2.59             | 2.11     | 2.2              | 0.21    |
| B4                    | 1.81             | 1.33     | 0.8              | 0.072                 | B4                | 2.3              | 1.89     | 1.4              | 0.058   |
| B5                    | 1.64             | 1.38     | 0.8              | 0.203                 | B5                | 1.96             | 1.61     | 0.8              | 0.053   |
| C1                    | 2.11             | 1.94     | 2                | 0.856                 | C1                | 2.56             | 2.35     | 2.4              | 0.705   |
| C2                    | 2                | 1.47     | 1.2              | 0.091                 | C2                | 2.19             | 1.94     | 1.8              | 0.608   |
| C3                    | 2.07             | 1.59     | 1.8              | 0.332                 | C3                | 2.48             | 2        | 2.2              | 0.266   |
| C4                    | 2.04             | 1.65     | 2                | 0.519                 | C4                | 2.48             | 2.12     | 2                | 0.365   |
| C5                    | 1.92             |          |                  |                       | C5                | 1.92             |          |                  |         |
| D1                    | 2.21             | 2.35     | 2                | 0.753                 | D1                | 2.44             | 2.67     | 2.2              | 0.479   |
| D2                    | 2.25             | 2.24     | 1.8              | 0.629                 | D2                | 2.4              | 2.56     | 2                | 0.476   |
| D3                    | 2.21             | 2.29     | 1.6              | 0.405                 | D3                | 2.4              | 2.67     | 1.8              | 0.201   |
| D4                    | 2.08             | 2.06     | 1.4              | 0.346                 | D4                | 2.28             | 2.5      | 1.6              | 0.17    |
| E1                    | 1.93             | 2        | 1.8              | 0.922                 | E1                | 2.7              | 2.51     | 1.6              | 0.008   |
| E2                    | 2                | 2.18     | 1.6              | 0.515                 | E2                | 2.56             | 2.61     | 1.6              | 0.027   |
| E3                    | 2.04             | 1.76     | 1.25             | 0.302                 | E3                | 2.56             | 2.5      | 1.25             | 0.018   |
| F1                    | 2.27             | 2.06     | 2                | 0.699                 | F1                | 2.62             | 2.71     | 2.2              | 0.307   |
| F2                    | 2.15             | 1.94     | 1.4              | 0.319                 | F2                | 2.31             | 2.18     | 2                | 0.747   |
| F3                    | 2.15             | 2.24     | 1.2              | 0.07                  | F3                | 2.38             | 2.35     | 1.8              | 0.273   |
| G1                    | 2.29             | 2.29     | 2.2              | 0.987                 | G1                | 2.69             | 2.72     | 2.4              | 0.621   |
| G2                    | 2.25             | 2.18     | 1.8              | 0.608                 | G2                | 2.58             | 2.67     | 2                | 0.198   |
| G3                    | 2.08             | 2.06     | 1.8              | 0.853                 | G3                | 2.56             | 2.61     | 1.8              | 0.114   |
| G4                    | 2.04             | 2.06     | 1.8              | 0.864                 | G4                | 2.52             | 2.44     | 1.8              | 0.201   |
| H1                    | 1.57             | 1.5      | 0.8              | 0.345                 | H1                | 1.75             | 1.82     | 1.2              | 0.516   |
| H2                    | 1.62             | 1.56     | 0.6              | 0.182                 | H2                | 1.91             | 2        | 0.8              | 0.097   |
| H3                    | 1.48             | 1.31     | 0.6              | 0.294                 | H3                | 1.74             | 1.71     | 0.8              | 0.193   |
